# Supplementary material for: Into the second dimension with ferrocenebis-amidinium salts
Source: Royal Society of Chemistry journal article supplement (doi:10.1039/c2ce06398k), 2011-12-13

## Supporting Information for:

# Into the second dimension with ferrocene *bis*-amidinium salts

Francesca A. Stokes,<sup>a</sup> Martyn P. Coles,<sup>\*b</sup> and Peter B. Hitchcock<sup>a</sup>

<sup>a</sup> Department of Chemistry, University of Sussex, Falmer, Brighton, UK.

<sup>b</sup> School of Chemical and Physical Sciences, Victoria University of Wellington, Wellington, New Zealand.

Fax: +64 (0)4 4635241; Tel: +64 (0)4 463 6357; E-mail: martyn.coles@vuw.ac.nz

## Contents

|    |          |                                                                                                |
|----|----------|------------------------------------------------------------------------------------------------|
| p2 | Fig S1   | Definition of <i>E</i> - and <i>Z</i> -                                                        |
| p2 | Fig S2   | Definition of $\alpha$                                                                         |
| p3 | Fig S3   | Definition of <i>l</i>                                                                         |
| p3 | Fig S4   | Definition of $\phi_{\text{O}}$ and $\phi_{\text{N}}$                                          |
| p3 | Fig S5   | Definition of $d_{\text{O}}$ and $d_{\text{N}}$                                                |
| p4 | Fig S6   | Definition <i>ss-S<sub>p</sub></i> and <i>ss-R<sub>p</sub></i>                                 |
| p5 | Table S1 | Summary of geometric data for [1] <sub>∞</sub> and [2] <sub>∞</sub>                            |
| p6 | Fig S7   | Disorder in [ <sup>t</sup> BuCO <sub>2</sub> ⋯H⋯O <sub>2</sub> C <sup>t</sup> Bu] <sup>-</sup> |
| p7 | Fig S8   | Contour map showing hydrogen H3x                                                               |

**Figure S1** Definition of *E*- and *Z*- with respect distribution of substituents about a tri-substituted amidinium cation (for **1** and **2**, R = ferrocenyl, R' = Cy)

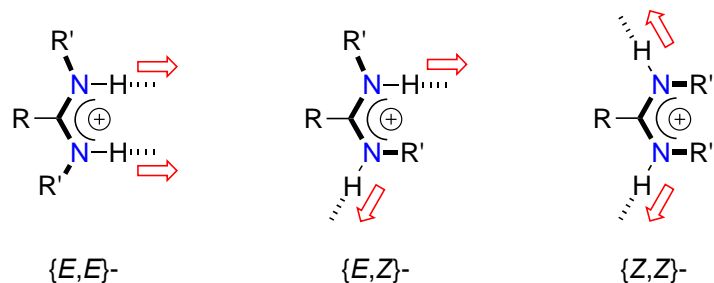

**Figure S2** Definition of  $\alpha$  (dihedral angle between the amidinium and  $C_5$ -ring, with +ve and -ve values defined relative to the *E*- and *Z*-nitrogen groups)

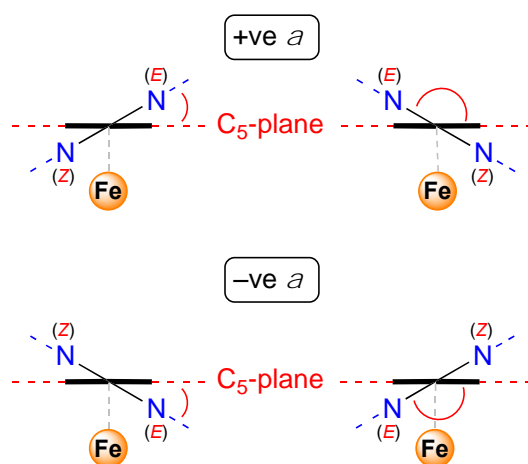

**Figure S3** Definition of  $l$  (the C<sub>5</sub>–CN<sub>2</sub> bond length)

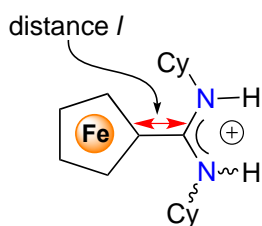

**Figure S4** Definition of  $\phi_{\text{O}}$  and  $\phi_{\text{N}}$  (the bond angle at oxygen and nitrogen subtending the amidinium:carboxylate bridge)

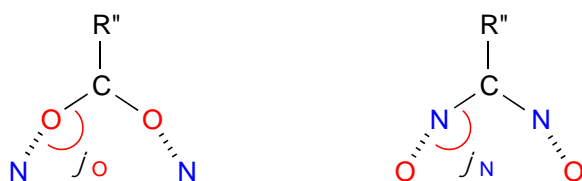

**Figure S5** Definition of  $d_{\text{O}}$  and  $d_{\text{N}}$  (the distance of the oxygen and nitrogen atoms from the C–CN<sub>2</sub> and C–CO<sub>2</sub> planes, respectively)

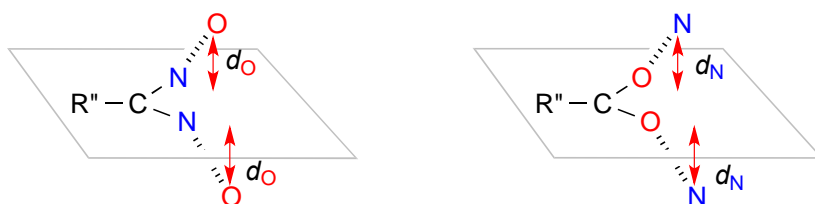

**Figure S6** Definition  $ss-S_p$  and  $ss-R_p$  chirality, prioritizing the (*E*)-nitrogen group

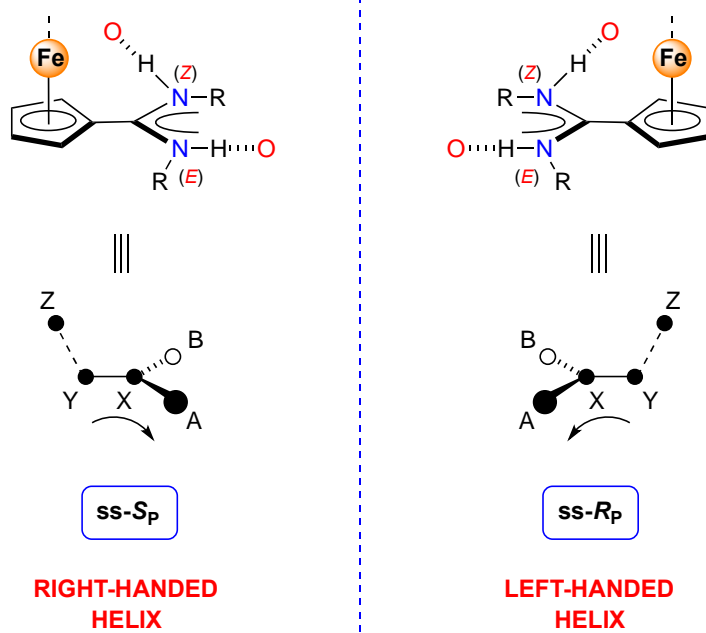

**Table S1** Summary of geometric data for [1]<sub>∞</sub> and [2]<sub>∞</sub>

|          | $\alpha$ , deg | $l$ , Å  |    | $\phi_{\text{O}}$ , deg | $d_{\text{O}}$ , Å |    | $\phi_{\text{N}}$ , deg | $d_{\text{N}}$ , Å |
|----------|----------------|----------|----|-------------------------|--------------------|----|-------------------------|--------------------|
| <b>1</b> | +26.3(2)       | 1.480(3) | O1 | 116.41(15)              | -0.343(5)          | N1 | 130.34(16)              | -0.293(5)          |
|          | +153.7(2)      |          | O2 | 140.26(18)              | -0.367(5)          | N2 | 129.69(15)              | 2.590(4)           |
|          |                |          |    |                         |                    |    |                         |                    |
| <b>2</b> | +39.8(1)       | 1.477(2) | O1 | ~135 <sup>a</sup>       | ~0.1 <sup>a</sup>  | N1 | ~101 <sup>a</sup>       | ~1.9 <sup>a</sup>  |
|          | +39.8(1)       |          | O2 | ~110 <sup>a</sup>       | -                  | N2 | ~133 <sup>a</sup>       | ~1.0 <sup>a</sup>  |
|          |                |          | O3 | ~109 <sup>a</sup>       | -                  |    |                         |                    |
|          |                |          | O4 | ~147 <sup>a</sup>       | ~0.1 <sup>a</sup>  |    |                         |                    |

<sup>a</sup> disorder in the [<sup>t</sup>BuCO<sub>2</sub>⋯H⋯O<sub>2</sub>C<sup>t</sup>Bu]<sup>-</sup> anion precludes accurate determination of these distances and angle. The values provided are meant simply as an indication and should not be used for meaningful comparisons.

**Figure S7** Representation of the disorder in the  $[\text{}^i\text{BuCO}_2\cdots\text{H}\cdots\text{O}_2\text{C}^i\text{Bu}]^-$  anion

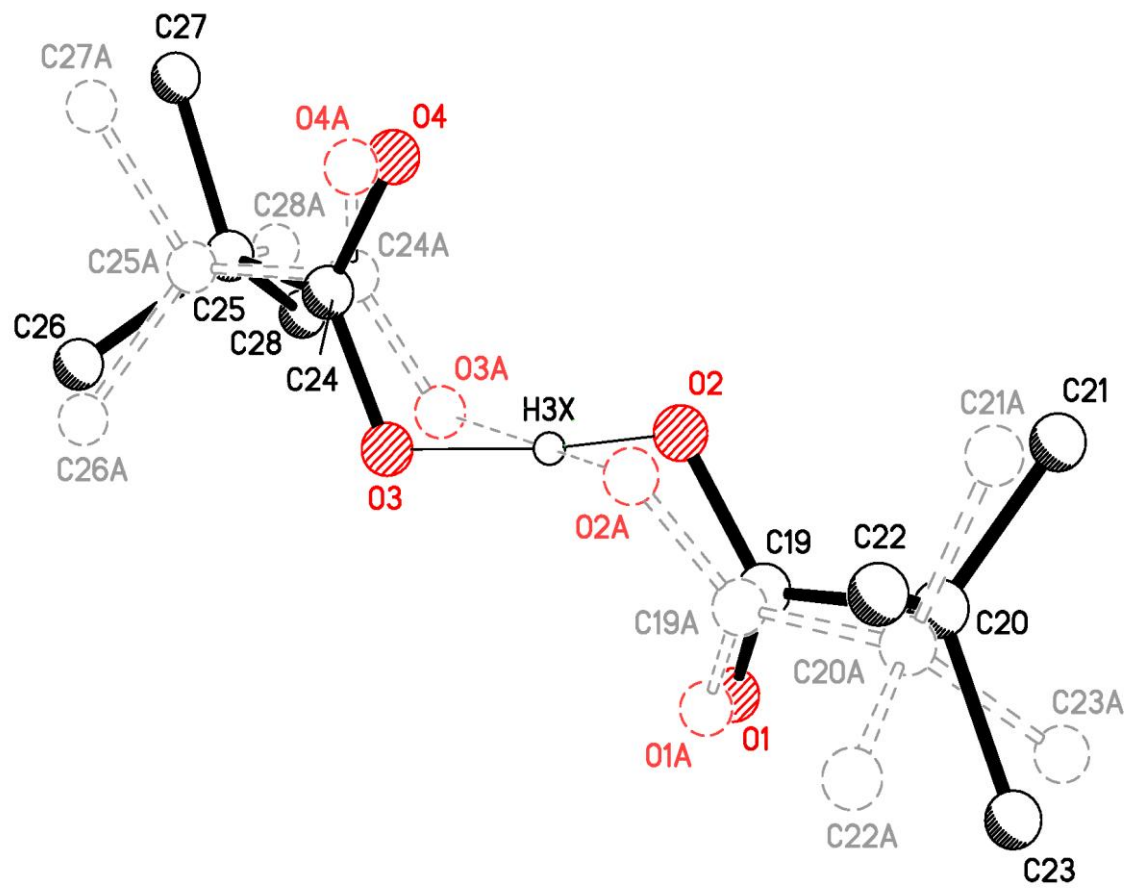

**Figure S8** Contour map showing residual electron density corresponding to hydrogen H3x between the two pivalate anions.

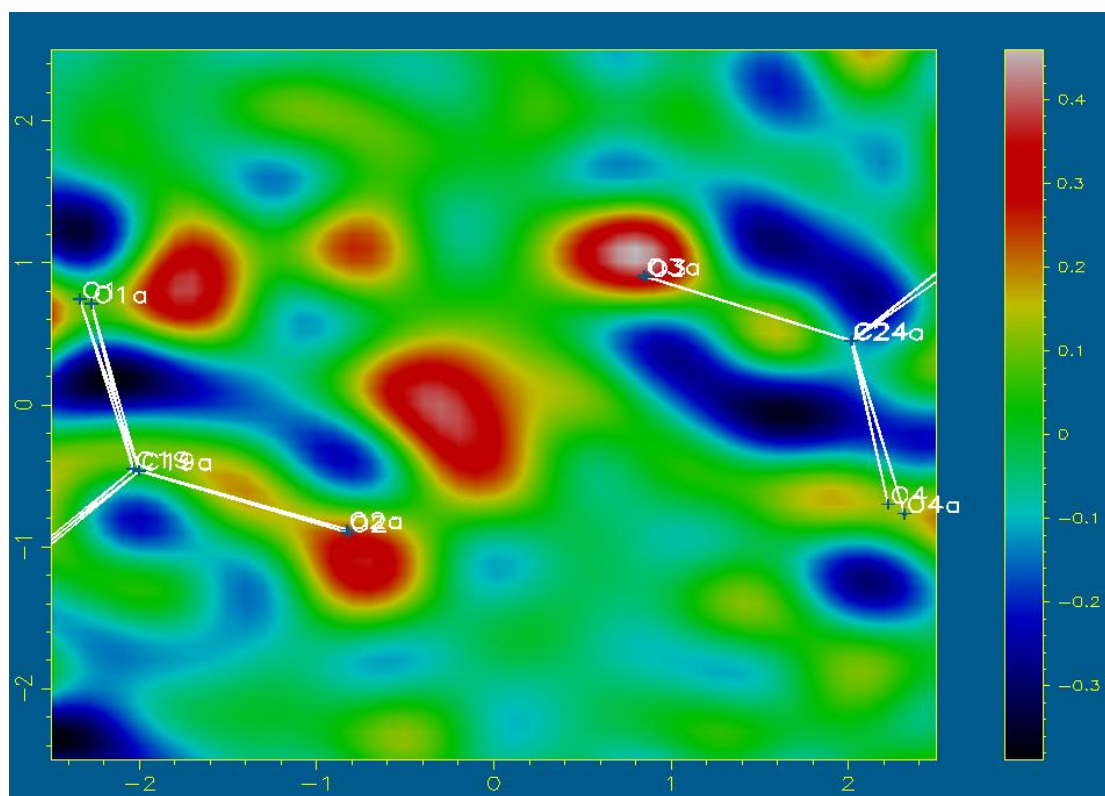

Supplement: c2ce06398k.pdf [file c2ce06398k.pdf]
